# Supplementary material for: DHCR24 Promotes Melanoma Stem-Like Cells Formation and Mediates Vemurafenib Resistance by Accumulating 27-Hydroxycholesterol
Source: Research Square preprint supplement (doi:10.21203/rs.3.rs-1148681/v1), 2021-12-16
Supplement: Supplementary file 1 [file 5b8a7d6368f500d871ea20e1.docx]

**Table S1.** Clinical-pathological information and TNM staging of human melanoma specimens (n=63) used in this study.

| **Subject** | **Location** | **Stage** | **Type** | **Subject** | **Location** | **Stage** | | **Type** | |
| --- | --- | --- | --- | --- | --- | --- | --- | --- | --- |
| A1 | Skin | IIB | Malignant | B1 | Skin | IIB | | Malignant | |
| A2 | Skin | IIB | Malignant | B2 | Skin | IV | | Malignant | |
| A3 | Skin | IIB | Malignant | B3 | Skin | IIB | | Malignant | |
| A4 | Skin | IIB | Malignant | B4 | Skin | IIC | | Malignant | |
| A5 | Skin | IIC | Malignant | B5 | Skin | IIB | | Malignant | |
| A6 | Skin | IIA | Malignant | B6 | Skin | IV | | Malignant | |
| A7 | Skin | IIB | Malignant | B7 | Skin | IIB | | Malignant | |
| A8 | Skin | IIB | Malignant | B8 | Skin | IIB | | Malignant | |
| C1 | Skin | IIB | Malignant | D1 | Skin | IIB | | Malignant | |
| C2 | Skin | IV | Malignant | D2 | Skin | III | | Malignant | |
| C3 | Skin | IIB | Malignant | D3 | Skin | IIB | | Malignant | |
| C4 | Skin | IIB | Malignant | D4 | Skin | IIB | | Malignant | |
| C5 | Skin | IIB | Malignant | D5 | Skin | IIB | | Malignant | |
| C6 | Skin | IIB | Malignant | D6 | Skin | - | | Malignant | |
| C7 | Skin | IIB | Malignant | D7 | Esophagus | - | | Malignant | |
| C8 | Skin | IIB | Malignant | D8 | Urethra | - | | Malignant | |
| E1 | Cavidade nasal | - | Malignant | F1 | Lymph node | - | | Metastasis | |
| E2 | Cavidade nasal | - | Malignant | F2 | Lymph node | - | | Metastasis | |
| E3 | Mediastinum | - | Malignant | F3 | Lymph node | - | | Metastasis | |
| E4 | Skin | IIB | Malignant | F4 | Lymph node | - | | Metastasis | |
| E5 | Skin | IIC | Malignant | F5 | Small intestine | - | | Metastasis | |
| E6 | Eye | IV | Malignant | F6 | Lymph node | - | | Metastasis | |
| E7 | Lymph node | - | Metastasis | F7 | Liver | - | | Metastasis | |
| E8 | Lymph node | - | Metastasis | F8 | Lymph node | - | | Metastasis | |
| G1 | Skin | - | Control | H1 | Oral cavity | - | | Control | |
| G2 | Skin | - | Control | H2 | Esophagus | - | | Control | |
| G3 | Skin | - | Control | H3 | Esophagus | - | | Control | |
| G4 | Skin | - | Control | H4 | Small intestine | - | | Control | |
| G5 | Skin | - | Control | H5 | Small intestine | - | | Control | |
| G6 | Skin | - | Control | H6 | Lymph node | - | | Control | |
| G7 | Skin | - | Control | H7 | Lymph node | - | | Control | |
| G8 | Oral cavity | - | Control |  |  | |  | |  | |

**Table S1.** Qualitative and quantitative detection of cholesterol metabolites by LC-MS in the melanoma cell with overexpressed DHCR24.

| **Compound** | **Average**  **(NC)**  **(ng/ml)** | **Average (DHCR24)**  **(ng/ml)** | **FC (DHCR24/NC)** | ***p* Value** |
| --- | --- | --- | --- | --- |
| 27-Hydroxycholesterol | 89.784 | 129.240 | 1.439 | 0.0000751 |
| 25-Hydroxycholesterol | 2.338 | 3.108 | 1.330 | 0.1311811 |
| 7α-Hydroxycholesterol | 13.642 | 14.948 | 1.096 | 0.3981013 |
| 7a-Hydroxy-cholestene-3-one | 2.486 | 2.700 | 1.086 | 0.4755491 |
| 7β-Hydroxycholesterol | 17.241 | 16.509 | 0.958 | 0.6148834 |
| 7-Ketocholesterol | 35.229 | 33.715 | 0.957 | 0.5765399 |
| Cholesterol | 6211.131 | 5676.205 | 0.914 | 0.0951267 |
| 4β-Hydroxycholesterol | 5.561 | 4.991 | 0.897 | 0.7118280 |
| Prostaglandin E2 | 0.141 | 0.116 | 0.827 | 0.2729710 |
| 22β-Hydroxycholesterol | 0.000 | 0.000 | 0.000 | 0.0000000 |
| 24(S)-hydroxycholesterol | 0.000 | 0.000 | 0.000 | 0.0000000 |
| Aldosterone | 0.000 | 0.000 | 0.000 | 0.0000000 |
| Androsterone | 0.000 | 0.000 | 0.000 | 0.0000000 |
| Dehydroepiandrosterone sulfate | 1.114 | 0.000 | 0.000 | 0.3632175 |
| Deoxycorticosterone | 0.000 | 0.000 | 0.000 | 0.0000000 |
| Progesterone | 0.000 | 0.000 | 0.000 | 0.0000000 |
| Tetrahydrocorticosterone | 0.000 | 0.000 | 0.000 | 0.0000000 |
