# Supplementary material for: DHCR24 Promotes Melanoma Stem-Like Cells Formation and Mediates Vemurafenib Resistance by Accumulating 27-Hydroxycholesterol
Source: Research Square preprint supplement (doi:10.21203/rs.3.rs-1148681/v1), 2021-12-16
Supplement: Supplementary file 2 [file c5a9461eafd4efc8c17438f5.docx]

**
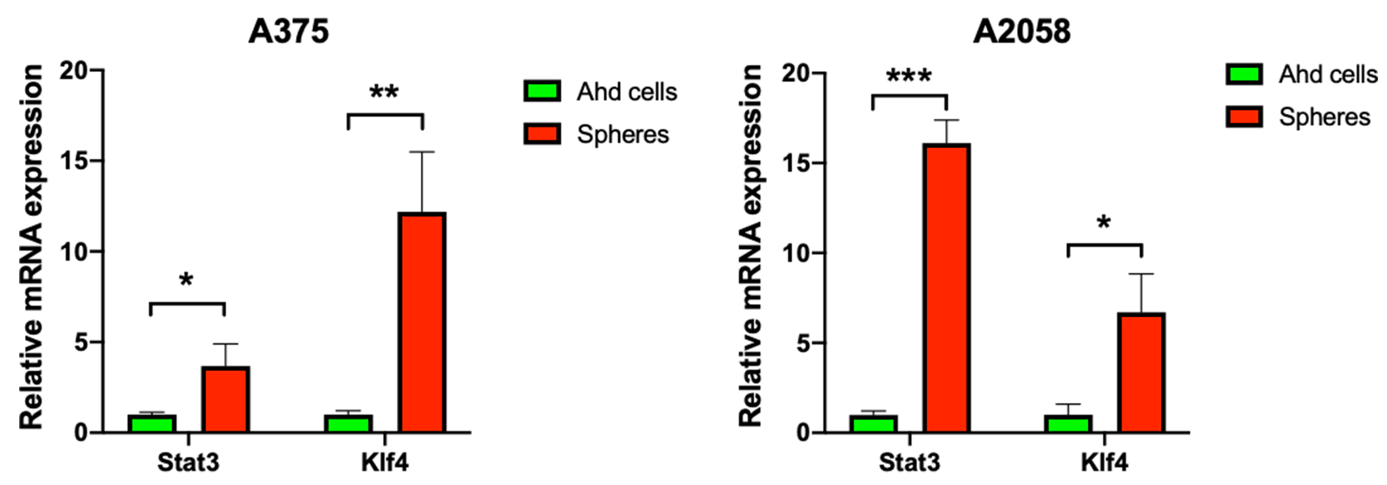
**

**Figure S1.** Levels of stem cell markers are up‐regulated in human melanoma sphere cultures. Stat3 and Klf4 gene expression was determined by qRT‐PCR in melanoma CSCs spheres and compared with the adherent cells.


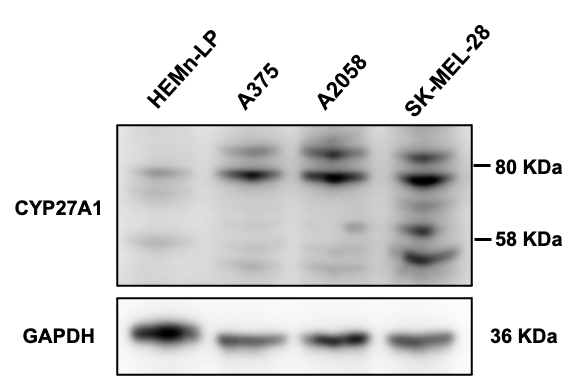


**Figure S2.** Western blots of DHCR24 in four distinct cell lines: human melanocytes (HEMn-LP), the malignant melanoma (A375 and SK-MEL-28), and the metastasis melanoma (A2058).


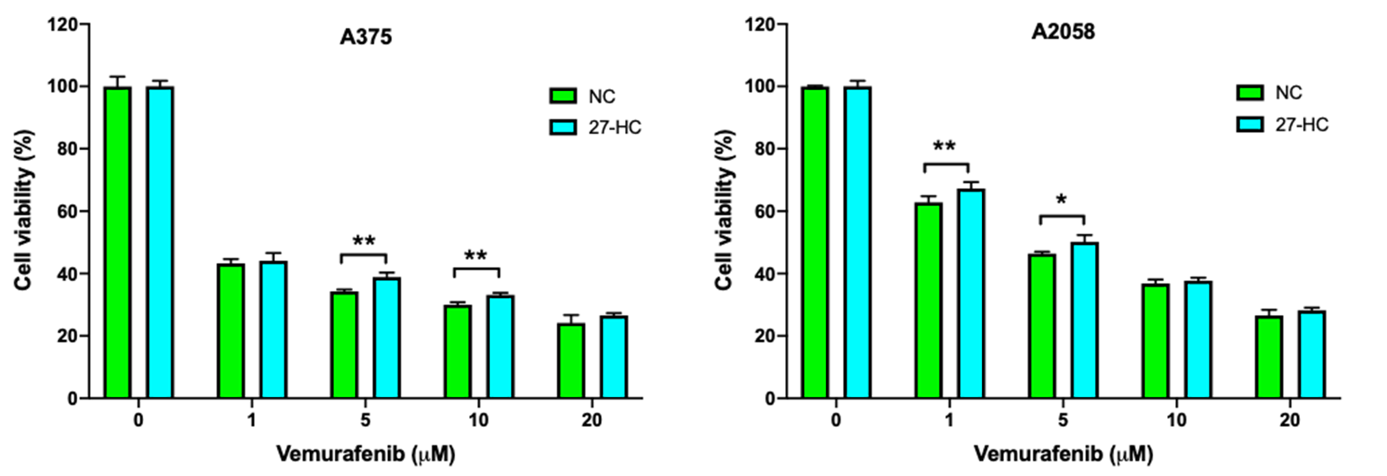


**Figure S3.** Cell proliferation in A375 and A2058 melanoma cells with 100 nM 27-HC (ethanol as a control) were treated with multiple concentrations (0, 1, 5, 10 and 20 μM) of vemurafenib and DMSO as a control for 2 days.
